# Supplementary material
Source: PubMed Central journal article supplement (PMC2755574)
Supplement: NIHMS111207-supplement-1.pdf [file NIHMS111207-supplement-1.pdf]

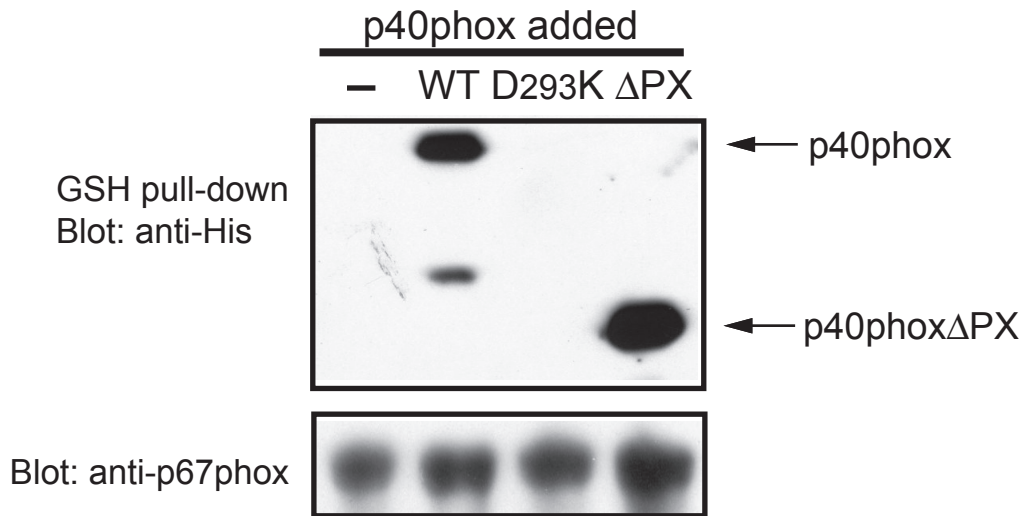

**Supplemental Figure 1. A ΔPX domain truncation of p40phox retains the ability to bind to p67phox.** Recombinant GST-p67phox was expressed in *E. coli* and bound to GSH beads. Following washing, the beads (20 μls) were incubated with 20μgs of His<sub>6</sub>-tagged wild-type or D293K forms of full-length p40phox, or 10μgs of the p40phox ΔPX truncation mutant for 2 hr at 4°C. Following 4 washes in TNE buffer containing 0.5% NP-40, the beads were eluted in Laemmli sample buffer, and analyzed by SDS-PAGE and immunoblotting using anti-p67phox and anti-His antibodies. The D293K mutant, which disrupts the PB1 domain function of p40phox known to bind to the PB1 domain of p67phox, serves as a negative control.

**Bissonnette et al., Supplemental Figure 1**
